# Supplementary material for: 3D-printed components for quantum devices
Source: PubMed Central journal article supplement (PMC5976634; doi:10.1038/s41598-018-26455-9), 2018-05-30
Supplement: 41598_2018_26455_MOESM1_ESM.pdf [file 41598_2018_26455_MOESM1_ESM.pdf]

1 **Supplementary Material - 3D-printed components for quantum devices**

2 R. Saint,<sup>1,2</sup> W. Evans,<sup>1,2</sup> Y. Zhou,<sup>1</sup> T. Barrett,<sup>1,2</sup> T. M. Fromhold,<sup>1</sup> E. Saleh,<sup>3</sup>  
3 I. Maskery,<sup>3</sup> C. Tuck,<sup>3</sup> R. Wildman,<sup>3</sup> F. Oručević,<sup>1,2</sup> and P. Krüger<sup>1,2</sup>

4 <sup>1</sup>*School of Physics and Astronomy, The University of Nottingham, Nottingham, NG7 2RD, United Kingdom*

5 <sup>2</sup>*Department of Physics and Astronomy, University of Sussex, Brighton, BN1 9QH, United Kingdom*

6 <sup>3</sup>*Faculty of Engineering, EPSRC Centre for Innovative Manufacturing in Additive Manufacturing,*  
7 *University of Nottingham, Nottingham, United Kingdom*

8 (Dated: 26th April 2018)

## Supplementary Note 1 - Device model

11 A simple idealized comparison of a three-dimensional  
 12 (3D) versus two-dimensional (2D) scenario of generating  
 13 a quadrupole field demonstrates the key principles behind  
 14 beneficial power consumption. We consider a planarised  
 15 conductor configuration forming a quadrupole field with  
 16 an out-of-plane zero formed by multiple in-plane cur-  
 17 rents, whose fields compensate each other at the zero po-  
 18 sition. As all these fields necessarily drop monotonically in  
 19 magnitude with distance from the plane, the field gradi-  
 20 ents will also at least partially compensate each other  
 21 at the field zero. This gradient compensation needs to  
 22 be minimised in order to obtain a power-efficient planar  
 23 solution. In contrast in 3D the currents generating the  
 24 fields that cancel at the trap center position of a device  
 25 can be formed in such a way that the gradients produced  
 26 by them add, rather than subtract as in planar imple-  
 27 mentation.

28 As a simple model illustrating the 2D vs 3D differ-  
 29 ence, we choose two infinitesimally thin current loops in  
 30 the anti-Helmholtz configuration (two parallel loops with  
 31 equal radius  $R$  carrying equal currents  $I$  are placed at  
 32 a distance  $d = R$  from each other) and compare them  
 33 to two in-plane concentric current loops (Supplementary  
 34 Figure 1). The in-plane loops have radii  $R_1$  and  $R_2$  and  
 35 carry currents  $I_1$  and  $I_2$ , respectively. The 3D configura-  
 36 tion field zero occurs at a distance  $R/2$  from either loop.  
 37 Consequently, the planar configuration parameters are  
 38 chosen such that a field zero forms at  $R/2$  from the cur-  
 39 rent plane in that case. We further impose equal power  
 40 consumption in both configurations which is obtained  
 41 when  $R_1 I_1^2 + R_2 I_2^2 = 2RI^2$ . Finally, we require the  
 42 field curvature to vanish at the field zero, so that in ap-  
 43 proximation of the ideal quadrupole field the field varies  
 44 only linearly at this center position. Note that without  
 45 loss of generality it is sufficient to only consider the field  
 46 along the loops' symmetry axis  $z$ , where the field is al-  
 47 ways oriented along  $z$ . We find that under the above con-  
 48 straints the maximal gradient is achieved in the planar  
 49 configuration when  $R_1 = 1.14R$  and  $R_2 = 2.51R$  with  
 50 the currents  $I_1 = 0.46I$  and  $I_2 = -0.84I$ . Even in this  
 51 optimal configuration, the gradient is reduced by a factor  
 52 larger than 7 with respect to the 3D anti-Helmholtz con-  
 53 figuration. Calculated field configurations are shown in  
 54 Supplementary Figure 1(a) for a 3D structure and (b) for  
 55 a planar structure. Supplementary Figure 1(c) displays  
 56 the corresponding fields along the symmetry axis of the  
 57 loops. To match the gradient obtained in the 3D config-  
 58 uration with the 2D configuration requires a more than  
 59 50-fold increase of power consumption.

60 Now let us examine the relationship between device  
 61 size and power consumption. Again, for the 3D case, the  
 62 idealised anti-Helmholtz configuration may serve as an  
 63 illustration of a scaling law that is extendible to more

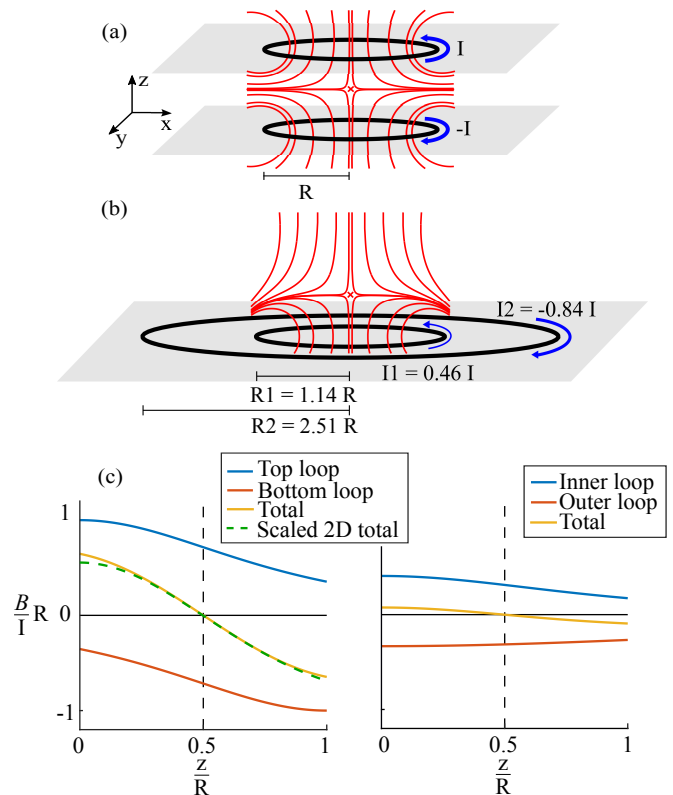

FIG. 1. Comparison of two quadrupole field generating structures whereby two current loops are placed in two parallel planes (3D) or a single plane (2D). Streamline plots show the field produced from the 3D system (a) and 2D system (b). (c) Magnetic field strength along the symmetry axis  $z$  of the current loops (due to symmetry radial fields vanish). The field of one loop (blue) is compensated by the other (red) in both configurations at the same zero-field position (red cross). At equal power consumption, the total field gradient (yellow) for the 3D system is stronger than that in the 2D case by a factor of 7.37. To reach the same gradient with the planar 2D assembly, the current needs to be scaled up by the same factor (dashed green line). This corresponds to an increased power dissipation by a factor of 54.3.

64 general magnetic field generating structures. In the anti-  
 65 Helmholtz configuration, as in other configurations e.g.  
 66 for magnetic traps of various shapes, the key parameter  
 67 is the generated field gradient at the field zero (field min-  
 68 imum). As the field of a single current loop at the po-  
 69 sition of the quadrupole field zero ( $z = R/2$ ) scales as  
 70  $\sim 1/R$ , the gradient at that position scales as  $\sim 1/R^2$ .  
 71 Conversely, in order to maintain a constant gradient, the  
 72 required current scales as  $\sim R^2$ . If the conductor cross  
 73 section is assumed to scale with size of the device, the  
 74 resistance  $Z$  of the structure increases with the length  
 75 of the current loop ( $\sim R$ ) and drops as  $\sim 1/R^2$  with  
 76 the cross section, such that the Ohmic power dissipation  
 77 scales as  $P = ZI^2 \sim R^3$ . This signifies that power con-  
 78 sumption will drop cubically as we scale down the device  
 79 with a characteristic radius.

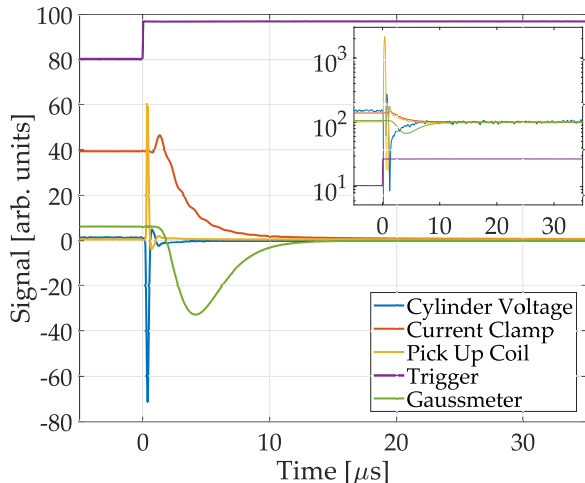

FIG. 2. Magnetic field decay measurement. The plot shows the characteristics of the switch-off process for the cylinder, using a current of 15 A. The voltage across the device itself (blue trace) is displayed, along with the current flowing via a current clamp (red), after sending a trigger (purple) to open an IGBT. Also shown is the voltage induced in a pick-up coil due to changes in the magnetic field (yellow), along with the signal from a Hall effect Gaussmeter (green). After an initial transient period, the Hall probe signal decays to below 10% of its initial value within  $(13.0 \pm 2.3) \mu\text{s}$ , after which time all signals settle to their steady state background readings. The inset depicts the same data set on a semi-log plot to emphasise the similar decay times of all measured signals.

## 80 Supplementary Note 2 - Field Decay Measurement

81 It is important to investigate the decay of the magnetic  
82 field after switching off the trap as this can limit the  
83 experimental cycle length in typical cold atom devices.

84 To characterise this switching process, the voltage  
85 across the cylinder was measured along with the cur-  
86 rent flowing through it using a current clamp (Chauvin  
87 Arnoux P01120043A), as a function of time after opening  
88 an insulated gate bipolar transistor (IGBT). In addition,  
89 the magnetic field inside the cylinder during the switch-  
90 ing was measured using a Hall effect Gaussmeter (Hirst  
91 GM08) and its derivative with a small single-turn pick-  
92 up coil. Both the Hall probe and the pick-coil were ori-  
93 ented along the strong eigenaxis of the quadrupole field,  
94 at the position of largest field. The results are shown

95 by the signal traces in Supplementary Figure 2, obtained  
96 for a current of 15 A, corresponding to a magnetic field  
97 of  $(6.2 \pm 0.6) \text{ G}$  at the position of the Hall probe.

98 Shortly after opening the IGBT, a large flyback voltage  
99 develops across the cylinder, as expected when switching  
100 a current through an inductive load. Some oscillatory  
101 behaviour can also be seen, arising due to contact res-  
102 istances and small parasitic capacitance and inductance  
103 within the circuit, which are non-negligible in compar-  
104 ison to the impedance characteristics of the cylinder it-  
105 self. Following the initial transient period of the switch-  
106 ing process, the magnetic field measured with the Hall  
107 probe is seen to decay below 10% of its initial value  
108 within  $(13.0 \pm 2.3) \mu\text{s}$ .

109 Finally, in order to determine the inductance,  $L$ , of  
110 the cylinder the resonant frequencies,  $f_{\text{res}}(C)$ , of a par-  
111 allel  $LC$  circuit for various known capacitances,  $C$ , were  
112 measured with a network analyser (Mini Radio Solutions  
113 miniVNA). Supplementary Figure 3 shows a plot of  $f_{\text{res}}^2$   
114 against  $1/C$ , and using the relation  $f_{\text{res}}^2 = 1/(4\pi^2 LC)$ ,  
115 a value for the inductance of  $(0.49 \pm 0.05) \mu\text{H}$  is extracted  
116 from the gradient of the linear fit.

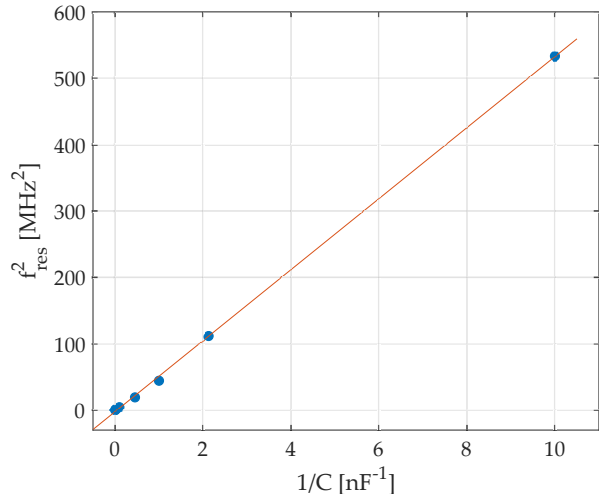

FIG. 3. Cylinder inductance measurement. A plot showing the resonant frequencies,  $f_{\text{res}}(C)$  of a parallel  $LC$  circuit for various known capacitances, from which an inductance of  $(0.49 \pm 0.05) \mu\text{H}$  is extracted from the linear fit, as described in the text.
